# Supplementary material for: Horizontal transfer of a retrotransposon between parasitic nematodes and the common shrew
Source: Mob DNA. 2019 May 30;10:24. doi: 10.1186/s13100-019-0166-3 (PMC6542046; doi:10.1186/s13100-019-0166-3)
Supplement: Supplementary file 4 — Individual Kimura distances of RTE1_Sar. (CSV 44.7 kb) [file 13100_2019_166_MOESM4_ESM.csv]

	Div	Unspecified	species	genomesize	percgen
1	0	42378	Sorex araneus	2423158183	0.00174887468334955
2	1	36752	Sorex araneus	2423158183	0.00151669834259433
3	2	159560	Sorex araneus	2423158183	0.0065847950463744
4	3	489832	Sorex araneus	2423158183	0.0202146109749039
5	4	1282047	Sorex araneus	2423158183	0.0529081018727699
6	5	3546484	Sorex araneus	2423158183	0.14635792350994
7	6	7276958	Sorex araneus	2423158183	0.300308830478031
8	7	9627723	Sorex araneus	2423158183	0.397321275496772
9	8	8776181	Sorex araneus	2423158183	0.362179450832822
10	9	7790378	Sorex araneus	2423158183	0.321496881823666
11	10	6321087	Sorex araneus	2423158183	0.2608615089327
12	11	4469859	Sorex araneus	2423158183	0.184464185266934
13	12	3305061	Sorex araneus	2423158183	0.136394768743828
14	13	2514132	Sorex araneus	2423158183	0.103754349082047
15	14	1976726	Sorex araneus	2423158183	0.0815764325196759
16	15	1660229	Sorex araneus	2423158183	0.0685150895904182
17	16	1524895	Sorex araneus	2423158183	0.0629300641905308
18	17	1386130	Sorex araneus	2423158183	0.057203446713656
19	18	1372552	Sorex araneus	2423158183	0.0566431036004718
20	19	1310494	Sorex araneus	2423158183	0.0540820656775093
21	20	1197281	Sorex araneus	2423158183	0.0494099398214978
22	21	1075042	Sorex araneus	2423158183	0.04436532486992
23	22	877867	Sorex araneus	2423158183	0.0362282168023036
24	23	724305	Sorex araneus	2423158183	0.029890949962799
25	24	569828	Sorex araneus	2423158183	0.0235159224848673
26	25	503084	Sorex araneus	2423158183	0.0207615005710092
27	26	487421	Sorex araneus	2423158183	0.0201151127243599
28	27	405064	Sorex araneus	2423158183	0.0167163663867172
29	28	353789	Sorex araneus	2423158183	0.0146003262387926
30	29	298594	Sorex araneus	2423158183	0.0123225137382622
31	30	210610	Sorex araneus	2423158183	0.00869154979140708
32	31	141474	Sorex araneus	2423158183	0.00583841372769348
33	32	87777	Sorex araneus	2423158183	0.00362242137619457
34	33	67178	Sorex araneus	2423158183	0.00277233242432527
35	34	47142	Sorex araneus	2423158183	0.0019454776139144
36	35	39963	Sorex araneus	2423158183	0.00164921135897631
37	36	35473	Sorex araneus	2423158183	0.00146391598571095
38	37	29451	Sorex araneus	2423158183	0.00121539733586596
39	38	29115	Sorex araneus	2423158183	0.00120153113421403
40	39	17572	Sorex araneus	2423158183	0.000725169331630051
41	40	16358	Sorex araneus	2423158183	0.000675069424470998
42	41	11816	Sorex araneus	2423158183	0.000487628091426172
43	42	6946	Sorex araneus	2423158183	0.000286650704387795
44	43	6752	Sorex araneus	2423158183	0.000278644623672098
45	44	5464	Sorex araneus	2423158183	0.000225490850673037
46	45	3794	Sorex araneus	2423158183	0.000156572526986366
47	46	2353	Sorex araneus	2423158183	9.71046800208008e-05
48	47	1593	Sorex araneus	2423158183	6.57406524747708e-05
49	48	1386	Sorex araneus	2423158183	5.71980818142073e-05
50	49	407	Sorex araneus	2423158183	1.6796262120045e-05
51	50	275	Sorex araneus	2423158183	1.13488257567872e-05
52	51	0	Sorex araneus	2423158183	0
53	52	0	Sorex araneus	2423158183	0
54	53	181	Sorex araneus	2423158183	7.46959077083083e-06
55	54	0	Sorex araneus	2423158183	0
56	55	0	Sorex araneus	2423158183	0
57	56	0	Sorex araneus	2423158183	0
58	57	0	Sorex araneus	2423158183	0
59	58	0	Sorex araneus	2423158183	0
60	59	0	Sorex araneus	2423158183	0
61	60	0	Sorex araneus	2423158183	0
62	61	0	Sorex araneus	2423158183	0
63	62	0	Sorex araneus	2423158183	0
64	63	0	Sorex araneus	2423158183	0
65	64	0	Sorex araneus	2423158183	0
66	65	0	Sorex araneus	2423158183	0
67	66	0	Sorex araneus	2423158183	0
68	67	0	Sorex araneus	2423158183	0
69	68	0	Sorex araneus	2423158183	0
70	69	0	Sorex araneus	2423158183	0
71	70	0	Sorex araneus	2423158183	0
72	0	43807	Heligmosomoides polygyrus	560662278	0.00781343809258379
73	1	142791	Heligmosomoides polygyrus	560662278	0.0254682730768629
74	2	364853	Heligmosomoides polygyrus	560662278	0.065075360750416
75	3	628379	Heligmosomoides polygyrus	560662278	0.112077987882752
76	4	717365	Heligmosomoides polygyrus	560662278	0.127949574663555
77	5	544534	Heligmosomoides polygyrus	560662278	0.0971233523936133
78	6	485211	Heligmosomoides polygyrus	560662278	0.0865424729002367
79	7	468543	Heligmosomoides polygyrus	560662278	0.0835695602121461
80	8	365239	Heligmosomoides polygyrus	560662278	0.0651442079005001
81	9	339288	Heligmosomoides polygyrus	560662278	0.0605155747610329
82	10	296714	Heligmosomoides polygyrus	560662278	0.0529220551556351
83	11	262573	Heligmosomoides polygyrus	560662278	0.0468326495830347
84	12	225974	Heligmosomoides polygyrus	560662278	0.040304833920002
85	13	165348	Heligmosomoides polygyrus	560662278	0.0294915507049682
86	14	142133	Heligmosomoides polygyrus	560662278	0.0253509118728334
87	15	118445	Heligmosomoides polygyrus	560662278	0.0211259085277715
88	16	109883	Heligmosomoides polygyrus	560662278	0.0195987859914485
89	17	85302	Heligmosomoides polygyrus	560662278	0.0152145067266323
90	18	81518	Heligmosomoides polygyrus	560662278	0.0145395906232165
91	19	80326	Heligmosomoides polygyrus	560662278	0.0143269849162208
92	20	60633	Heligmosomoides polygyrus	560662278	0.0108145317384809
93	21	56819	Heligmosomoides polygyrus	560662278	0.0101342648202917
94	22	60885	Heligmosomoides polygyrus	560662278	0.0108594785825773
95	23	47689	Heligmosomoides polygyrus	560662278	0.00850583352425932
96	24	47899	Heligmosomoides polygyrus	560662278	0.00854328922767299
97	25	45074	Heligmosomoides polygyrus	560662278	0.00803942083651292
98	26	47671	Heligmosomoides polygyrus	560662278	0.00850262303539529
99	27	44001	Heligmosomoides polygyrus	560662278	0.00784804002811832
100	28	39427	Heligmosomoides polygyrus	560662278	0.00703221913567012
101	29	39920	Heligmosomoides polygyrus	560662278	0.00712015085844602
102	30	40797	Heligmosomoides polygyrus	560662278	0.0072765730103212
103	31	54073	Heligmosomoides polygyrus	560662278	0.00964448690803486
104	32	59461	Heligmosomoides polygyrus	560662278	0.0106054932413341
105	33	62593	Heligmosomoides polygyrus	560662278	0.0111641183036751
106	34	74322	Heligmosomoides polygyrus	560662278	0.0132561085195748
107	35	70925	Heligmosomoides polygyrus	560662278	0.0126502179267356
108	36	77488	Heligmosomoides polygyrus	560662278	0.0138207978386589
109	37	72373	Heligmosomoides polygyrus	560662278	0.0129084839197974
110	38	43820	Heligmosomoides polygyrus	560662278	0.00781575677898558
111	39	38397	Heligmosomoides polygyrus	560662278	0.00684850782845069
112	40	22145	Heligmosomoides polygyrus	560662278	0.00394979310521761
113	41	18885	Heligmosomoides polygyrus	560662278	0.00336833789984351
114	42	9364	Heligmosomoides polygyrus	560662278	0.00167016765126474
115	43	9160	Heligmosomoides polygyrus	560662278	0.00163378211080575
116	44	1301	Heligmosomoides polygyrus	560662278	0.000232047000672301
117	45	1647	Heligmosomoides polygyrus	560662278	0.000293759731058632
118	46	815	Heligmosomoides polygyrus	560662278	0.000145363801343525
119	47	653	Heligmosomoides polygyrus	560662278	0.000116469401567266
120	48	0	Heligmosomoides polygyrus	560662278	0
121	49	180	Heligmosomoides polygyrus	560662278	3.21048886402877e-05
122	50	0	Heligmosomoides polygyrus	560662278	0
123	51	180	Heligmosomoides polygyrus	560662278	3.21048886402877e-05
124	52	0	Heligmosomoides polygyrus	560662278	0
125	53	0	Heligmosomoides polygyrus	560662278	0
126	54	0	Heligmosomoides polygyrus	560662278	0
127	55	142	Heligmosomoides polygyrus	560662278	2.5327189927338e-05
128	56	0	Heligmosomoides polygyrus	560662278	0
129	57	0	Heligmosomoides polygyrus	560662278	0
130	58	0	Heligmosomoides polygyrus	560662278	0
131	59	0	Heligmosomoides polygyrus	560662278	0
132	60	0	Heligmosomoides polygyrus	560662278	0
133	61	0	Heligmosomoides polygyrus	560662278	0
134	62	0	Heligmosomoides polygyrus	560662278	0
135	63	0	Heligmosomoides polygyrus	560662278	0
136	64	0	Heligmosomoides polygyrus	560662278	0
137	65	0	Heligmosomoides polygyrus	560662278	0
138	66	0	Heligmosomoides polygyrus	560662278	0
139	67	0	Heligmosomoides polygyrus	560662278	0
140	68	0	Heligmosomoides polygyrus	560662278	0
141	69	0	Heligmosomoides polygyrus	560662278	0
142	70	0	Heligmosomoides polygyrus	560662278	0
143	0	32433	Angiostrongylus cantonensis	253242791	0.0128070772999813
144	1	156830	Angiostrongylus cantonensis	253242791	0.0619287125136763
145	2	378612	Angiostrongylus cantonensis	253242791	0.149505539132997
146	3	1047235	Angiostrongylus cantonensis	253242791	0.413530034108651
147	4	2155647	Angiostrongylus cantonensis	253242791	0.851217517974677
148	5	2546433	Angiostrongylus cantonensis	253242791	1.0055303015516
149	6	1916410	Angiostrongylus cantonensis	253242791	0.756748096335741
150	7	1460486	Angiostrongylus cantonensis	253242791	0.576713751350182
151	8	1193378	Angiostrongylus cantonensis	253242791	0.471238685724325
152	9	898775	Angiostrongylus cantonensis	253242791	0.354906450229416
153	10	680081	Angiostrongylus cantonensis	253242791	0.268549006790878
154	11	582509	Angiostrongylus cantonensis	253242791	0.230019973204292
155	12	425985	Angiostrongylus cantonensis	253242791	0.168212093350369
156	13	346065	Angiostrongylus cantonensis	253242791	0.136653445744088
157	14	272603	Angiostrongylus cantonensis	253242791	0.107644920087775
158	15	287153	Angiostrongylus cantonensis	253242791	0.113390394595675
159	16	272669	Angiostrongylus cantonensis	253242791	0.107670982033996
160	17	229188	Angiostrongylus cantonensis	253242791	0.0905012928877411
161	18	236029	Angiostrongylus cantonensis	253242791	0.0932026531013868
162	19	251969	Angiostrongylus cantonensis	253242791	0.0994970079918287
163	20	279284	Angiostrongylus cantonensis	253242791	0.110283099825732
164	21	294628	Angiostrongylus cantonensis	253242791	0.116342107444235
165	22	327276	Angiostrongylus cantonensis	253242791	0.129234083508423
166	23	302970	Angiostrongylus cantonensis	253242791	0.119636179495431
167	24	264651	Angiostrongylus cantonensis	253242791	0.104504850446069
168	25	257411	Angiostrongylus cantonensis	253242791	0.101645933921175
169	26	223520	Angiostrongylus cantonensis	253242791	0.0882631245364848
170	27	180092	Angiostrongylus cantonensis	253242791	0.0711143639228017
171	28	169423	Angiostrongylus cantonensis	253242791	0.0669014108283146
172	29	152125	Angiostrongylus cantonensis	253242791	0.0600708116504687
173	30	106917	Angiostrongylus cantonensis	253242791	0.0422191682447537
174	31	113134	Angiostrongylus cantonensis	253242791	0.0446741246032153
175	32	89517	Angiostrongylus cantonensis	253242791	0.0353482915136566
176	33	103453	Angiostrongylus cantonensis	253242791	0.0408513109461031
177	34	92349	Angiostrongylus cantonensis	253242791	0.0364665859333386
178	35	101946	Angiostrongylus cantonensis	253242791	0.0402562298407144
179	36	89674	Angiostrongylus cantonensis	253242791	0.0354102873554256
180	37	100434	Angiostrongylus cantonensis	253242791	0.0396591743454604
181	38	99556	Angiostrongylus cantonensis	253242791	0.0393124714851212
182	39	107770	Angiostrongylus cantonensis	253242791	0.0425559991557667
183	40	119893	Angiostrongylus cantonensis	253242791	0.0473431048230708
184	41	115082	Angiostrongylus cantonensis	253242791	0.0454433468947197
185	42	127737	Angiostrongylus cantonensis	253242791	0.0504405276436872
186	43	129679	Angiostrongylus cantonensis	253242791	0.0512073806673533
187	44	132083	Angiostrongylus cantonensis	253242791	0.0521566673145693
188	45	105763	Angiostrongylus cantonensis	253242791	0.0417634790638522
189	46	84200	Angiostrongylus cantonensis	253242791	0.0332487253309414
190	47	46221	Angiostrongylus cantonensis	253242791	0.0182516547924162
191	48	28784	Angiostrongylus cantonensis	253242791	0.0113661675763161
192	49	19293	Angiostrongylus cantonensis	253242791	0.00761838073408376
193	50	11662	Angiostrongylus cantonensis	253242791	0.0046050669217273
194	51	5334	Angiostrongylus cantonensis	253242791	0.00210627910825702
195	52	2954	Angiostrongylus cantonensis	253242791	0.00116646953239431
196	53	1356	Angiostrongylus cantonensis	253242791	0.000535454531457916
197	54	749	Angiostrongylus cantonensis	253242791	0.000295763601815619
198	55	1638	Angiostrongylus cantonensis	253242791	0.000646810119858456
199	56	935	Angiostrongylus cantonensis	253242791	0.000369210904803209
200	57	0	Angiostrongylus cantonensis	253242791	0
201	58	0	Angiostrongylus cantonensis	253242791	0
202	59	0	Angiostrongylus cantonensis	253242791	0
203	60	0	Angiostrongylus cantonensis	253242791	0
204	61	0	Angiostrongylus cantonensis	253242791	0
205	62	0	Angiostrongylus cantonensis	253242791	0
206	63	0	Angiostrongylus cantonensis	253242791	0
207	64	0	Angiostrongylus cantonensis	253242791	0
208	65	0	Angiostrongylus cantonensis	253242791	0
209	66	0	Angiostrongylus cantonensis	253242791	0
210	67	0	Angiostrongylus cantonensis	253242791	0
211	68	0	Angiostrongylus cantonensis	253242791	0
212	69	0	Angiostrongylus cantonensis	253242791	0
213	70	0	Angiostrongylus cantonensis	253242791	0
214	0	687	Angiostrongylus costaricensis	262782696	0.000261432739087204
215	1	883	Angiostrongylus costaricensis	262782696	0.000336019080951966
216	2	3840	Angiostrongylus costaricensis	262782696	0.00146128343245249
217	3	9794	Angiostrongylus costaricensis	262782696	0.00372703383787493
218	4	40064	Angiostrongylus costaricensis	262782696	0.0152460571452543
219	5	191764	Angiostrongylus costaricensis	262782696	0.0729743635783385
220	6	796350	Angiostrongylus costaricensis	262782696	0.303045068081652
221	7	1406547	Angiostrongylus costaricensis	262782696	0.535250996892124
222	8	1532797	Angiostrongylus costaricensis	262782696	0.583294495159605
223	9	1118916	Angiostrongylus costaricensis	262782696	0.425795159663024
224	10	738071	Angiostrongylus costaricensis	262782696	0.280867428196261
225	11	571807	Angiostrongylus costaricensis	262782696	0.217596899911553
226	12	430058	Angiostrongylus costaricensis	262782696	0.163655372498347
227	13	387591	Angiostrongylus costaricensis	262782696	0.147494871580129
228	14	370718	Angiostrongylus costaricensis	262782696	0.14107397695623
229	15	329024	Angiostrongylus costaricensis	262782696	0.125207635437304
230	16	342751	Angiostrongylus costaricensis	262782696	0.130431343165762
231	17	366658	Angiostrongylus costaricensis	262782696	0.13952897416046
232	18	348102	Angiostrongylus costaricensis	262782696	0.132467626407182
233	19	372709	Angiostrongylus costaricensis	262782696	0.141831637194254
234	20	333217	Angiostrongylus costaricensis	262782696	0.126803250393626
235	21	343695	Angiostrongylus costaricensis	262782696	0.130790575342906
236	22	350193	Angiostrongylus costaricensis	262782696	0.133263340901259
237	23	269884	Angiostrongylus costaricensis	262782696	0.102702348407294
238	24	235420	Angiostrongylus costaricensis	262782696	0.0895873296010328
239	25	190031	Angiostrongylus costaricensis	262782696	0.0723148833209322
240	26	174098	Angiostrongylus costaricensis	262782696	0.066251698703936
241	27	156720	Angiostrongylus costaricensis	262782696	0.0596386300869674
242	28	115095	Angiostrongylus costaricensis	262782696	0.0437985460047187
243	29	107764	Angiostrongylus costaricensis	262782696	0.0410087884934402
244	30	102132	Angiostrongylus costaricensis	262782696	0.0388655727925099
245	31	89567	Angiostrongylus costaricensis	262782696	0.0340840555193939
246	32	98228	Angiostrongylus costaricensis	262782696	0.0373799346361832
247	33	100522	Angiostrongylus costaricensis	262782696	0.0382528992700494
248	34	107148	Angiostrongylus costaricensis	262782696	0.040774374276151
249	35	109522	Angiostrongylus costaricensis	262782696	0.0416777823148599
250	36	121196	Angiostrongylus costaricensis	262782696	0.0461202361665397
251	37	131404	Angiostrongylus costaricensis	262782696	0.0500048146244759
252	38	132185	Angiostrongylus costaricensis	262782696	0.0503020183642533
253	39	136652	Angiostrongylus costaricensis	262782696	0.052001901982161
254	40	137771	Angiostrongylus costaricensis	262782696	0.0524277291073991
255	41	137772	Angiostrongylus costaricensis	262782696	0.0524281096499596
256	42	132861	Angiostrongylus costaricensis	262782696	0.0505592651351747
257	43	134709	Angiostrongylus costaricensis	262782696	0.0512625077870424
258	44	124145	Angiostrongylus costaricensis	262782696	0.0472424561775559
259	45	98000	Angiostrongylus costaricensis	262782696	0.0372931709323813
260	46	97228	Angiostrongylus costaricensis	262782696	0.0369993920756487
261	47	58260	Angiostrongylus costaricensis	262782696	0.0221704095767402
262	48	30772	Angiostrongylus costaricensis	262782696	0.0117100556727677
263	49	19022	Angiostrongylus costaricensis	262782696	0.00723868058648732
264	50	6395	Angiostrongylus costaricensis	262782696	0.00243356967461815
265	51	4909	Angiostrongylus costaricensis	262782696	0.00186808342966388
266	52	3140	Angiostrongylus costaricensis	262782696	0.00119490364007834
267	53	3025	Angiostrongylus costaricensis	262782696	0.00115114124561687
268	54	795	Angiostrongylus costaricensis	262782696	0.00030253133562493
269	55	1407	Angiostrongylus costaricensis	262782696	0.000535423382672046
270	56	606	Angiostrongylus costaricensis	262782696	0.000230608791683909
271	57	0	Angiostrongylus costaricensis	262782696	0
272	58	245	Angiostrongylus costaricensis	262782696	9.32329273309533e-05
273	59	0	Angiostrongylus costaricensis	262782696	0
274	60	0	Angiostrongylus costaricensis	262782696	0
275	61	0	Angiostrongylus costaricensis	262782696	0
276	62	0	Angiostrongylus costaricensis	262782696	0
277	63	0	Angiostrongylus costaricensis	262782696	0
278	64	0	Angiostrongylus costaricensis	262782696	0
279	65	0	Angiostrongylus costaricensis	262782696	0
280	66	0	Angiostrongylus costaricensis	262782696	0
281	67	0	Angiostrongylus costaricensis	262782696	0
282	68	0	Angiostrongylus costaricensis	262782696	0
283	69	0	Angiostrongylus costaricensis	262782696	0
284	70	0	Angiostrongylus costaricensis	262782696	0
285	0	13347	Haemonchus contortus	319757902	0.00417409543799171
286	1	87147	Haemonchus contortus	319757902	0.0272540567269546
287	2	124498	Haemonchus contortus	319757902	0.0389350815793131
288	3	144100	Haemonchus contortus	319757902	0.0450653444680157
289	4	152553	Haemonchus contortus	319757902	0.0477089069717501
290	5	93260	Haemonchus contortus	319757902	0.0291658155800634
291	6	161079	Haemonchus contortus	319757902	0.0503752992474913
292	7	132664	Haemonchus contortus	319757902	0.0414888886780349
293	8	160713	Haemonchus contortus	319757902	0.050260837650855
294	9	140467	Haemonchus contortus	319757902	0.0439291723899289
295	10	155529	Haemonchus contortus	319757902	0.0486396111017766
296	11	135845	Haemonchus contortus	319757902	0.0424837038116418
297	12	128669	Haemonchus contortus	319757902	0.0402395059497232
298	13	155262	Haemonchus contortus	319757902	0.0485561104288206
299	14	175886	Haemonchus contortus	319757902	0.055005990125617
300	15	152321	Haemonchus contortus	319757902	0.0476363520798932
301	16	166825	Haemonchus contortus	319757902	0.052172283767361
302	17	183125	Haemonchus contortus	319757902	0.057269890393514
303	18	189111	Haemonchus contortus	319757902	0.0591419316980632
304	19	203148	Haemonchus contortus	319757902	0.0635318153920087
305	20	212266	Haemonchus contortus	319757902	0.0663833477366261
306	21	208841	Haemonchus contortus	319757902	0.0653122248719283
307	22	216354	Haemonchus contortus	319757902	0.0676618149690011
308	23	213665	Haemonchus contortus	319757902	0.0668208662439873
309	24	196145	Haemonchus contortus	319757902	0.0613417209623798
310	25	195955	Haemonchus contortus	319757902	0.0612823010078419
311	26	165748	Haemonchus contortus	319757902	0.0518354664461115
312	27	179639	Haemonchus contortus	319757902	0.0561796905960435
313	28	156264	Haemonchus contortus	319757902	0.0488694725048577
314	29	143592	Haemonchus contortus	319757902	0.0449064742737773
315	30	114460	Haemonchus contortus	319757902	0.0357958315600907
316	31	120065	Haemonchus contortus	319757902	0.0375487202189612
317	32	103958	Haemonchus contortus	319757902	0.0325114717571546
318	33	81417	Haemonchus contortus	319757902	0.0254620759927303
319	34	85740	Haemonchus contortus	319757902	0.0268140363267707
320	35	58290	Haemonchus contortus	319757902	0.0182294165790467
321	36	60257	Haemonchus contortus	319757902	0.0188445694768162
322	37	54450	Haemonchus contortus	319757902	0.0170285080241739
323	38	41221	Haemonchus contortus	319757902	0.0128913155053163
324	39	37837	Haemonchus contortus	319757902	0.0118330148413346
325	40	29750	Haemonchus contortus	319757902	0.00930391393423641
326	41	28242	Haemonchus contortus	319757902	0.00883230713716654
327	42	16397	Haemonchus contortus	319757902	0.00512794207662771
328	43	17374	Haemonchus contortus	319757902	0.00543348573759406
329	44	11158	Haemonchus contortus	319757902	0.00348951501439361
330	45	6815	Haemonchus contortus	319757902	0.00213129994829651
331	46	5418	Haemonchus contortus	319757902	0.00169440691414094
332	47	1554	Haemonchus contortus	319757902	0.000485992680800114
333	48	3209	Haemonchus contortus	319757902	0.00100357175848621
334	49	1610	Haemonchus contortus	319757902	0.000503505930558676
335	50	472	Haemonchus contortus	319757902	0.000147611676536457
336	51	336	Haemonchus contortus	319757902	0.000105079498551376
337	52	703	Haemonchus contortus	319757902	0.000219853831790528
338	53	0	Haemonchus contortus	319757902	0
339	54	291	Haemonchus contortus	319757902	9.10063514239595e-05
340	55	512	Haemonchus contortus	319757902	0.000160121140649716
341	56	0	Haemonchus contortus	319757902	0
342	57	0	Haemonchus contortus	319757902	0
343	58	0	Haemonchus contortus	319757902	0
344	59	0	Haemonchus contortus	319757902	0
345	60	0	Haemonchus contortus	319757902	0
346	61	0	Haemonchus contortus	319757902	0
347	62	0	Haemonchus contortus	319757902	0
348	63	0	Haemonchus contortus	319757902	0
349	64	0	Haemonchus contortus	319757902	0
350	65	0	Haemonchus contortus	319757902	0
351	66	0	Haemonchus contortus	319757902	0
352	67	0	Haemonchus contortus	319757902	0
353	68	0	Haemonchus contortus	319757902	0
354	69	0	Haemonchus contortus	319757902	0
355	70	0	Haemonchus contortus	319757902	0
356	0	3249	Haemonchus placei	259125910	0.00125383061848196
357	1	954	Haemonchus placei	259125910	0.000368160791022403
358	2	1539	Haemonchus placei	259125910	0.000593919766649348
359	3	11872	Haemonchus placei	259125910	0.00458155651050102
360	4	20044	Haemonchus placei	259125910	0.00773523573925896
361	5	37401	Haemonchus placei	259125910	0.0144335238417494
362	6	26426	Haemonchus placei	259125910	0.0101981310938763
363	7	24182	Haemonchus placei	259125910	0.0093321428181381
364	8	28305	Haemonchus placei	259125910	0.0109232612053345
365	9	49773	Haemonchus placei	259125910	0.0192080367416751
366	10	66944	Haemonchus placei	259125910	0.0258345450672995
367	11	70401	Haemonchus placei	259125910	0.0271686455437822
368	12	99214	Haemonchus placei	259125910	0.0382879504407722
369	13	86844	Haemonchus placei	259125910	0.0335142093664042
370	14	91562	Haemonchus placei	259125910	0.035334945857016
371	15	96289	Haemonchus placei	259125910	0.0371591555626375
372	16	119385	Haemonchus placei	259125910	0.0460721971029451
373	17	117535	Haemonchus placei	259125910	0.0453582584620735
374	18	136422	Haemonchus placei	259125910	0.0526469931162036
375	19	161523	Haemonchus placei	259125910	0.0623337897781044
376	20	146548	Haemonchus placei	259125910	0.0565547459148334
377	21	134942	Haemonchus placei	259125910	0.0520758422035064
378	22	147027	Haemonchus placei	259125910	0.0567395981359023
379	23	157708	Haemonchus placei	259125910	0.0608615325267936
380	24	181065	Haemonchus placei	259125910	0.0698752973023809
381	25	153453	Haemonchus placei	259125910	0.0592194736527891
382	26	153226	Haemonchus placei	259125910	0.0591318714519903
383	27	148486	Haemonchus placei	259125910	0.0573026448802437
384	28	138492	Haemonchus placei	259125910	0.0534458325684221
385	29	131107	Haemonchus placei	259125910	0.0505958666966186
386	30	118245	Haemonchus placei	259125910	0.0456322565350566
387	31	121145	Haemonchus placei	259125910	0.0467514035937201
388	32	99007	Haemonchus placei	259125910	0.0382080664955504
389	33	83345	Haemonchus placei	259125910	0.0321639005532098
390	34	90067	Haemonchus placei	259125910	0.034758006252636
391	35	60292	Haemonchus placei	259125910	0.0232674532623928
392	36	58204	Haemonchus placei	259125910	0.0224616673801551
393	37	47585	Haemonchus placei	259125910	0.0183636595815525
394	38	37162	Haemonchus placei	259125910	0.0143412906876043
395	39	28749	Haemonchus placei	259125910	0.0110946064791437
396	40	27275	Haemonchus placei	259125910	0.0105257710431195
397	41	22804	Haemonchus placei	259125910	0.00880035500888352
398	42	19351	Haemonchus placei	259125910	0.00746779818351627
399	43	13076	Haemonchus placei	259125910	0.00504619549623579
400	44	7000	Haemonchus placei	259125910	0.00270138945194635
401	45	8420	Haemonchus placei	259125910	0.00324938559791261
402	46	6933	Haemonchus placei	259125910	0.00267553329576344
403	47	3784	Haemonchus placei	259125910	0.00146029395516643
404	48	2073	Haemonchus placei	259125910	0.00079999719055497
405	49	859	Haemonchus placei	259125910	0.000331499077031702
406	50	0	Haemonchus placei	259125910	0
407	51	204	Haemonchus placei	259125910	7.87262068852937e-05
408	52	206	Haemonchus placei	259125910	7.94980324429927e-05
409	53	345	Haemonchus placei	259125910	0.00013313990870307
410	54	0	Haemonchus placei	259125910	0
411	55	0	Haemonchus placei	259125910	0
412	56	0	Haemonchus placei	259125910	0
413	57	0	Haemonchus placei	259125910	0
414	58	0	Haemonchus placei	259125910	0
415	59	0	Haemonchus placei	259125910	0
416	60	0	Haemonchus placei	259125910	0
417	61	0	Haemonchus placei	259125910	0
418	62	0	Haemonchus placei	259125910	0
419	63	0	Haemonchus placei	259125910	0
420	64	0	Haemonchus placei	259125910	0
421	65	0	Haemonchus placei	259125910	0
422	66	0	Haemonchus placei	259125910	0
423	67	0	Haemonchus placei	259125910	0
424	68	0	Haemonchus placei	259125910	0
425	69	0	Haemonchus placei	259125910	0
426	70	0	Haemonchus placei	259125910	0
427	0	13071	Nippostrongylus brasiliensis	294400206	0.00443987461068556
428	1	54262	Nippostrongylus brasiliensis	294400206	0.0184313729726127
429	2	102302	Nippostrongylus brasiliensis	294400206	0.0347492963371092
430	3	104129	Nippostrongylus brasiliensis	294400206	0.0353698801419996
431	4	76206	Nippostrongylus brasiliensis	294400206	0.0258851721048048
432	5	61619	Nippostrongylus brasiliensis	294400206	0.0209303522022671
433	6	39373	Nippostrongylus brasiliensis	294400206	0.013373971620115
434	7	41470	Nippostrongylus brasiliensis	294400206	0.0140862673173537
435	8	37280	Nippostrongylus brasiliensis	294400206	0.0126630346175777
436	9	41676	Nippostrongylus brasiliensis	294400206	0.0141562400944787
437	10	34370	Nippostrongylus brasiliensis	294400206	0.0116745842222678
438	11	21695	Nippostrongylus brasiliensis	294400206	0.0073692203870265
439	12	23167	Nippostrongylus brasiliensis	294400206	0.00786922003716261
440	13	21611	Nippostrongylus brasiliensis	294400206	0.0073406877982959
441	14	17313	Nippostrongylus brasiliensis	294400206	0.00588077034158054
442	15	20771	Nippostrongylus brasiliensis	294400206	0.00705536191098997
443	16	20718	Nippostrongylus brasiliensis	294400206	0.00703735920619566
444	17	15879	Nippostrongylus brasiliensis	294400206	0.00539367829110826
445	18	20016	Nippostrongylus brasiliensis	294400206	0.00679890828608999
446	19	14230	Nippostrongylus brasiliensis	294400206	0.00483355640043268
447	20	16667	Nippostrongylus brasiliensis	294400206	0.00566134114729526
448	21	16889	Nippostrongylus brasiliensis	294400206	0.00573674870322611
449	22	11291	Nippostrongylus brasiliensis	294400206	0.00383525546853727
450	23	10349	Nippostrongylus brasiliensis	294400206	0.00351528286634419
451	24	10376	Nippostrongylus brasiliensis	294400206	0.00352445405557902
452	25	12404	Nippostrongylus brasiliensis	294400206	0.00421331226921764
453	26	9359	Nippostrongylus brasiliensis	294400206	0.00317900592773362
454	27	9424	Nippostrongylus brasiliensis	294400206	0.0032010847166323
455	28	10245	Nippostrongylus brasiliensis	294400206	0.00347995680410631
456	29	5743	Nippostrongylus brasiliensis	294400206	0.00195074591761665
457	30	6039	Nippostrongylus brasiliensis	294400206	0.00205128932552445
458	31	5408	Nippostrongylus brasiliensis	294400206	0.00183695523636964
459	32	8561	Nippostrongylus brasiliensis	294400206	0.00290794633479299
460	33	6559	Nippostrongylus brasiliensis	294400206	0.00222791963671384
461	34	7823	Nippostrongylus brasiliensis	294400206	0.0026572671623742
462	35	7957	Nippostrongylus brasiliensis	294400206	0.002702783434873
463	36	7529	Nippostrongylus brasiliensis	294400206	0.00255740310181712
464	37	9340	Nippostrongylus brasiliensis	294400206	0.0031725521279017
465	38	6532	Nippostrongylus brasiliensis	294400206	0.00221874844747901
466	39	7537	Nippostrongylus brasiliensis	294400206	0.00256012049122004
467	40	7517	Nippostrongylus brasiliensis	294400206	0.00255332701771275
468	41	7313	Nippostrongylus brasiliensis	294400206	0.00248403358793845
469	42	8818	Nippostrongylus brasiliensis	294400206	0.00299524246936159
470	43	7429	Nippostrongylus brasiliensis	294400206	0.0025234357342807
471	44	6472	Nippostrongylus brasiliensis	294400206	0.00219836802695716
472	45	4193	Nippostrongylus brasiliensis	294400206	0.00142425172080212
473	46	3020	Nippostrongylus brasiliensis	294400206	0.00102581449959991
474	47	1429	Nippostrongylus brasiliensis	294400206	0.000485393682095453
475	48	649	Nippostrongylus brasiliensis	294400206	0.000220448215311371
476	49	165	Nippostrongylus brasiliensis	294400206	5.60461564350943e-05
477	50	680	Nippostrongylus brasiliensis	294400206	0.000230978099247662
478	51	0	Nippostrongylus brasiliensis	294400206	0
479	52	0	Nippostrongylus brasiliensis	294400206	0
480	53	0	Nippostrongylus brasiliensis	294400206	0
481	54	0	Nippostrongylus brasiliensis	294400206	0
482	55	0	Nippostrongylus brasiliensis	294400206	0
483	56	0	Nippostrongylus brasiliensis	294400206	0
484	57	0	Nippostrongylus brasiliensis	294400206	0
485	58	0	Nippostrongylus brasiliensis	294400206	0
486	59	0	Nippostrongylus brasiliensis	294400206	0
487	60	0	Nippostrongylus brasiliensis	294400206	0
488	61	0	Nippostrongylus brasiliensis	294400206	0
489	62	0	Nippostrongylus brasiliensis	294400206	0
490	63	0	Nippostrongylus brasiliensis	294400206	0
491	64	0	Nippostrongylus brasiliensis	294400206	0
492	65	0	Nippostrongylus brasiliensis	294400206	0
493	66	0	Nippostrongylus brasiliensis	294400206	0
494	67	0	Nippostrongylus brasiliensis	294400206	0
495	68	0	Nippostrongylus brasiliensis	294400206	0
496	69	0	Nippostrongylus brasiliensis	294400206	0
497	70	0	Nippostrongylus brasiliensis	294400206	0
498	0	16662	Ancylostoma ceylanicum	313092710	0.00532174639262601
499	1	276914	Ancylostoma ceylanicum	313092710	0.0884447293582786
500	2	98602	Ancylostoma ceylanicum	313092710	0.0314929082826617
501	3	69448	Ancylostoma ceylanicum	313092710	0.0221812893695289
502	4	70989	Ancylostoma ceylanicum	313092710	0.0226734758532065
503	5	57808	Ancylostoma ceylanicum	313092710	0.0184635407192968
504	6	50554	Ancylostoma ceylanicum	313092710	0.0161466550913945
505	7	30232	Ancylostoma ceylanicum	313092710	0.00965592587575738
506	8	15672	Ancylostoma ceylanicum	313092710	0.00500554612082792
507	9	13084	Ancylostoma ceylanicum	313092710	0.00417895389515776
508	10	20531	Ancylostoma ceylanicum	313092710	0.00655748260635005
509	11	19516	Ancylostoma ceylanicum	313092710	0.00623329747920352
510	12	15102	Ancylostoma ceylanicum	313092710	0.00482349141888356
511	13	9363	Ancylostoma ceylanicum	313092710	0.00299048802509646
512	14	9622	Ancylostoma ceylanicum	313092710	0.00307321112650627
513	15	4498	Ancylostoma ceylanicum	313092710	0.00143663517429071
514	16	9620	Ancylostoma ceylanicum	313092710	0.00307257233807839
515	17	15747	Ancylostoma ceylanicum	313092710	0.00502950068687323
516	18	11261	Ancylostoma ceylanicum	313092710	0.00359669824314977
517	19	16037	Ancylostoma ceylanicum	313092710	0.00512212500891509
518	20	12832	Ancylostoma ceylanicum	313092710	0.00409846655324552
519	21	13339	Ancylostoma ceylanicum	313092710	0.00426039941971182
520	22	17694	Ancylostoma ceylanicum	313092710	0.00565136122140947
521	23	16657	Ancylostoma ceylanicum	313092710	0.00532014942155632
522	24	17959	Ancylostoma ceylanicum	313092710	0.00573600068810289
523	25	14408	Ancylostoma ceylanicum	313092710	0.00460183183441096
524	26	13863	Ancylostoma ceylanicum	313092710	0.00442776198781505
525	27	14079	Ancylostoma ceylanicum	313092710	0.00449675113802554
526	28	10696	Ancylostoma ceylanicum	313092710	0.0034162405122751
527	29	12116	Ancylostoma ceylanicum	313092710	0.0038697802960663
528	30	7639	Ancylostoma ceylanicum	313092710	0.00243985240026828
529	31	9102	Ancylostoma ceylanicum	313092710	0.00290712613525879
530	32	6458	Ancylostoma ceylanicum	313092710	0.00206264783360813
531	33	4919	Ancylostoma ceylanicum	313092710	0.00157110013835838
532	34	4068	Ancylostoma ceylanicum	313092710	0.0012992956622976
533	35	5873	Ancylostoma ceylanicum	313092710	0.00187580221845472
534	36	7060	Ancylostoma ceylanicum	313092710	0.00225492315039849
535	37	8744	Ancylostoma ceylanicum	313092710	0.00279278300666917
536	38	8461	Ancylostoma ceylanicum	313092710	0.00270239444412487
537	39	10306	Ancylostoma ceylanicum	313092710	0.00329167676883949
538	40	14319	Ancylostoma ceylanicum	313092710	0.00457340574937053
539	41	20712	Ancylostoma ceylanicum	313092710	0.00661529295907273
540	42	18882	Ancylostoma ceylanicum	313092710	0.00603080154756717
541	43	12739	Ancylostoma ceylanicum	313092710	0.00406876289134934
542	44	12771	Ancylostoma ceylanicum	313092710	0.00407898350619534
543	45	10280	Ancylostoma ceylanicum	313092710	0.00328337251927712
544	46	3211	Ancylostoma ceylanicum	313092710	0.00102557482095319
545	47	5766	Ancylostoma ceylanicum	313092710	0.00184162703756341
546	48	3273	Ancylostoma ceylanicum	313092710	0.00104537726221732
547	49	1957	Ancylostoma ceylanicum	313092710	0.000625054476675615
548	50	0	Ancylostoma ceylanicum	313092710	0
549	51	766	Ancylostoma ceylanicum	313092710	0.000244655967876097
550	52	270	Ancylostoma ceylanicum	313092710	8.6236437763115e-05
551	53	211	Ancylostoma ceylanicum	313092710	6.73921791408047e-05
552	54	0	Ancylostoma ceylanicum	313092710	0
553	55	0	Ancylostoma ceylanicum	313092710	0
554	56	0	Ancylostoma ceylanicum	313092710	0
555	57	0	Ancylostoma ceylanicum	313092710	0
556	58	0	Ancylostoma ceylanicum	313092710	0
557	59	0	Ancylostoma ceylanicum	313092710	0
558	60	0	Ancylostoma ceylanicum	313092710	0
559	61	0	Ancylostoma ceylanicum	313092710	0
560	62	297	Ancylostoma ceylanicum	313092710	9.48600815394265e-05
561	63	0	Ancylostoma ceylanicum	313092710	0
562	64	0	Ancylostoma ceylanicum	313092710	0
563	65	0	Ancylostoma ceylanicum	313092710	0
564	66	0	Ancylostoma ceylanicum	313092710	0
565	67	0	Ancylostoma ceylanicum	313092710	0
566	68	0	Ancylostoma ceylanicum	313092710	0
567	69	0	Ancylostoma ceylanicum	313092710	0
568	70	0	Ancylostoma ceylanicum	313092710	0
569	0	827	Necator americanus	244075060	0.000338830194285315
570	1	6880	Necator americanus	244075060	0.00281880500203503
571	2	44056	Necator americanus	244075060	0.018050185053729
572	3	128716	Necator americanus	244075060	0.052736236139817
573	4	192012	Necator americanus	244075060	0.0786692421585393
574	5	204820	Necator americanus	244075060	0.0839168082146533
575	6	141483	Necator americanus	244075060	0.057967004084727
576	7	109070	Necator americanus	244075060	0.0446870729029013
577	8	88485	Necator americanus	244075060	0.0362531919484113
578	9	80115	Necator americanus	244075060	0.0328239190026216
579	10	54903	Necator americanus	244075060	0.0224943097422572
580	11	53892	Necator americanus	244075060	0.0220800929025686
581	12	55153	Necator americanus	244075060	0.0225967372495985
582	13	51727	Necator americanus	244075060	0.0211930706889921
583	14	68591	Necator americanus	244075060	0.0281024206242129
584	15	70845	Necator americanus	244075060	0.0290259070304029
585	16	92526	Necator americanus	244075060	0.0379088301770775
586	17	80342	Necator americanus	244075060	0.0329169231792876
587	18	92272	Necator americanus	244075060	0.0378047638296186
588	19	95745	Necator americanus	244075060	0.0392276867616052
589	20	76406	Necator americanus	244075060	0.0313043045037047
590	21	75211	Necator americanus	244075060	0.0308147010186129
591	22	96815	Necator americanus	244075060	0.0396660764930264
592	23	71606	Necator americanus	244075060	0.02933769636275
593	24	88133	Necator americanus	244075060	0.0361089740180746
594	25	72376	Necator americanus	244075060	0.0296531730853615
595	26	64789	Necator americanus	244075060	0.026544703092565
596	27	47321	Necator americanus	244075060	0.0193878882996075
597	28	63115	Necator americanus	244075060	0.0258588485034071
598	29	54848	Necator americanus	244075060	0.022471775690642
599	30	55237	Necator americanus	244075060	0.0226311528920652
600	31	44883	Necator americanus	244075060	0.0183890152480143
601	32	36337	Necator americanus	244075060	0.0148876333370562
602	33	36374	Necator americanus	244075060	0.0149027926081428
603	34	32697	Necator americanus	244075060	0.0133962888301656
604	35	31834	Necator americanus	244075060	0.0130427090748231
605	36	25785	Necator americanus	244075060	0.0105643731071909
606	37	27245	Necator americanus	244075060	0.0111625497500646
607	38	33415	Necator americanus	244075060	0.0136904606312501
608	39	29231	Necator americanus	244075060	0.0119762338683846
609	40	32294	Necator americanus	244075060	0.0132311756883313
610	41	27765	Necator americanus	244075060	0.0113755989653347
611	42	29267	Necator americanus	244075060	0.0119909834294417
612	43	18589	Necator americanus	244075060	0.00761609973587633
613	44	25201	Necator americanus	244075060	0.0103251024500414
614	45	17778	Necator americanus	244075060	0.00728382490206087
615	46	14483	Necator americanus	244075060	0.00593383035530136
616	47	7725	Necator americanus	244075060	0.00316500997684892
617	48	5408	Necator americanus	244075060	0.00221571183880893
618	49	3799	Necator americanus	244075060	0.00155648840155975
619	50	2469	Necator americanus	244075060	0.00101157406250356
620	51	433	Necator americanus	244075060	0.000177404442715286
621	52	165	Necator americanus	244075060	6.76021548453168e-05
622	53	1004	Necator americanus	244075060	0.000411348869483019
623	54	165	Necator americanus	244075060	6.76021548453168e-05
624	55	0	Necator americanus	244075060	0
625	56	0	Necator americanus	244075060	0
626	57	0	Necator americanus	244075060	0
627	58	0	Necator americanus	244075060	0
628	59	0	Necator americanus	244075060	0
629	60	0	Necator americanus	244075060	0
630	61	0	Necator americanus	244075060	0
631	62	0	Necator americanus	244075060	0
632	63	0	Necator americanus	244075060	0
633	64	0	Necator americanus	244075060	0
634	65	0	Necator americanus	244075060	0
635	66	0	Necator americanus	244075060	0
636	67	0	Necator americanus	244075060	0
637	68	0	Necator americanus	244075060	0
638	69	0	Necator americanus	244075060	0
639	70	0	Necator americanus	244075060	0
640	0	767	Teladorsagia circumcincta	700607159	0.000109476471963941
641	1	2200	Teladorsagia circumcincta	700607159	0.000314013348527602
642	2	12811	Teladorsagia circumcincta	700607159	0.00182855682181232
643	3	31444	Teladorsagia circumcincta	700607159	0.00448810715050087
644	4	60936	Teladorsagia circumcincta	700607159	0.00869759882085361
645	5	95526	Teladorsagia circumcincta	700607159	0.013634745059749
646	6	90385	Teladorsagia circumcincta	700607159	0.012900952957576
647	7	86759	Teladorsagia circumcincta	700607159	0.0123834018658665
648	8	67192	Teladorsagia circumcincta	700607159	0.00959053859739392
649	9	79716	Teladorsagia circumcincta	700607159	0.0113781309505574
650	10	96293	Teladorsagia circumcincta	700607159	0.0137442215317129
651	11	93278	Teladorsagia circumcincta	700607159	0.0133138805108898
652	12	96080	Teladorsagia circumcincta	700607159	0.0137138193302418
653	13	97810	Teladorsagia circumcincta	700607159	0.0139607480088567
654	14	91737	Teladorsagia circumcincta	700607159	0.0130939284335803
655	15	83015	Teladorsagia circumcincta	700607159	0.0118490082400086
656	16	62370	Teladorsagia circumcincta	700607159	0.00890227843075751
657	17	67902	Teladorsagia circumcincta	700607159	0.00969187926896419
658	18	64812	Teladorsagia circumcincta	700607159	0.00925083324762315
659	19	55510	Teladorsagia circumcincta	700607159	0.00792312771671235
660	20	63050	Teladorsagia circumcincta	700607159	0.00899933710212059
661	21	51198	Teladorsagia circumcincta	700607159	0.00730766155359825
662	22	50187	Teladorsagia circumcincta	700607159	0.0071633581466158
663	23	51247	Teladorsagia circumcincta	700607159	0.00731465548727001
664	24	49844	Teladorsagia circumcincta	700607159	0.00711440061091354
665	25	54795	Teladorsagia circumcincta	700607159	0.00782107337844088
666	26	55182	Teladorsagia circumcincta	700607159	0.00787631118111369
667	27	51855	Teladorsagia circumcincta	700607159	0.00740143735813582
668	28	43955	Teladorsagia circumcincta	700607159	0.00627384397024125
669	29	47732	Teladorsagia circumcincta	700607159	0.00681294779632704
670	30	40842	Teladorsagia circumcincta	700607159	0.00582951508207469
671	31	47350	Teladorsagia circumcincta	700607159	0.00675842366035543
672	32	38124	Teladorsagia circumcincta	700607159	0.00544156586330286
673	33	40526	Teladorsagia circumcincta	700607159	0.00578441134655891
674	34	30785	Teladorsagia circumcincta	700607159	0.00439404587928283
675	35	28670	Teladorsagia circumcincta	700607159	0.00409216486467561
676	36	34614	Teladorsagia circumcincta	700607159	0.0049405718390611
677	37	24969	Teladorsagia circumcincta	700607159	0.00356390877244804
678	38	19492	Teladorsagia circumcincta	700607159	0.00278215826795455
679	39	23886	Teladorsagia circumcincta	700607159	0.00340932856496832
680	40	18136	Teladorsagia circumcincta	700607159	0.00258861185858936
681	41	13809	Teladorsagia circumcincta	700607159	0.00197100469537166
682	42	15100	Teladorsagia circumcincta	700607159	0.00215527343762127
683	43	15549	Teladorsagia circumcincta	700607159	0.00221936070738895
684	44	15382	Teladorsagia circumcincta	700607159	0.0021955242395689
685	45	11790	Teladorsagia circumcincta	700607159	0.00168282608142747
686	46	4841	Teladorsagia circumcincta	700607159	0.000690972100100964
687	47	7471	Teladorsagia circumcincta	700607159	0.00106636078493169
688	48	1568	Teladorsagia circumcincta	700607159	0.000223805877496036
689	49	319	Teladorsagia circumcincta	700607159	4.55319355365023e-05
690	50	895	Teladorsagia circumcincta	700607159	0.000127746339514638
691	51	366	Teladorsagia circumcincta	700607159	5.22404025277738e-05
692	52	164	Teladorsagia circumcincta	700607159	2.34082677993303e-05
693	53	0	Teladorsagia circumcincta	700607159	0
694	54	0	Teladorsagia circumcincta	700607159	0
695	55	0	Teladorsagia circumcincta	700607159	0
696	56	0	Teladorsagia circumcincta	700607159	0
697	57	0	Teladorsagia circumcincta	700607159	0
698	58	0	Teladorsagia circumcincta	700607159	0
699	59	0	Teladorsagia circumcincta	700607159	0
700	60	0	Teladorsagia circumcincta	700607159	0
701	61	0	Teladorsagia circumcincta	700607159	0
702	62	0	Teladorsagia circumcincta	700607159	0
703	63	0	Teladorsagia circumcincta	700607159	0
704	64	0	Teladorsagia circumcincta	700607159	0
705	65	0	Teladorsagia circumcincta	700607159	0
706	66	0	Teladorsagia circumcincta	700607159	0
707	67	0	Teladorsagia circumcincta	700607159	0
708	68	0	Teladorsagia circumcincta	700607159	0
709	69	0	Teladorsagia circumcincta	700607159	0
710	70	0	Teladorsagia circumcincta	700607159	0
